# Supplementary material for: High electrochemical performance of ink solution based on manganese cobalt sulfide/reduced graphene oxide nano-composites for supercapacitor electrode materials
Source: Royal Society of Chemistry journal article supplement (doi:10.1039/d2ra02818b), 2022-01-01
Supplement: d2ra02818b1.pdf [file d2ra02818b1.pdf]

## SUPPORTING INFORMATION

### High electrochemical performance of ink solution based on manganese cobalt sulfide/reduced graphene oxide nanocomposites for supercapacitor electrode materials

Le Thi Thanh Tam<sup>a</sup>, Doan Thanh Tung<sup>\*a,b</sup>, Ha Minh Nguyet<sup>a,b</sup>, Nguyen Thi Ngoc Linh<sup>c</sup>, Ngo Thanh Dung<sup>a</sup>, Nguyen Van Quynh<sup>d</sup>, Nguyen Van Dang<sup>c</sup>, Dimitra Vernardou<sup>e</sup>, Top Khac Le<sup>f,g</sup>, Le Anh Tuan<sup>h</sup>, Phan Ngoc Minh<sup>\*b</sup> and Le Trong Lu<sup>\*a,b</sup>

<sup>a</sup> Institute for Tropical Technology, Vietnam Academy of Science and Technology, 18 Hoang Quoc Viet, Hanoi 1000, Vietnam.

<sup>b</sup> Graduate University of Science and Technology, Vietnam Academy of Science and Technology, 18 Hoang Quoc Viet, Hanoi 1000, Vietnam.

<sup>c</sup> Thai Nguyen University of Sciences, Tan Thinh Ward, Thai Nguyen City 25000, Thai Nguyen, Vietnam.

<sup>d</sup> University of Science and Technology of Hanoi, Vietnam Academy of Science and Technology, Hanoi 1000, Vietnam.

<sup>e</sup> Department of Electrical and Computer Engineering, School of Engineering, Hellenic Mediterranean University, 71410 Heraklion, Greece.

<sup>f</sup> Faculty of Materials Science and Technology, University of Science, Ho Chi Minh City, 700000, Vietnam.

<sup>g</sup> Vietnam National University, Ho Chi Minh City, 700000, Vietnam.

<sup>h</sup> Phenikaa University, Nguyen Thanh Binh street, Yen Nghia Ward, Ha Dong district, Hanoi 12116, Vietnam.

\* Author to whom correspondence should be addressed, email:

[dtungtnt167@gmail.com](mailto:dtungtnt167@gmail.com), [pnminh@vast.vn](mailto:pnminh@vast.vn), [ltlu@itt.vast.vn](mailto:ltlu@itt.vast.vn)

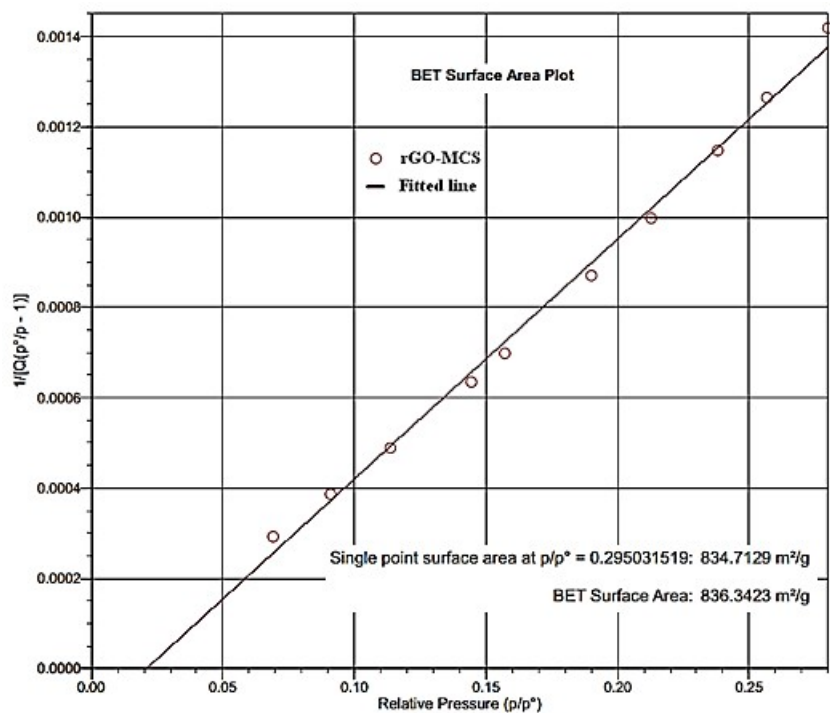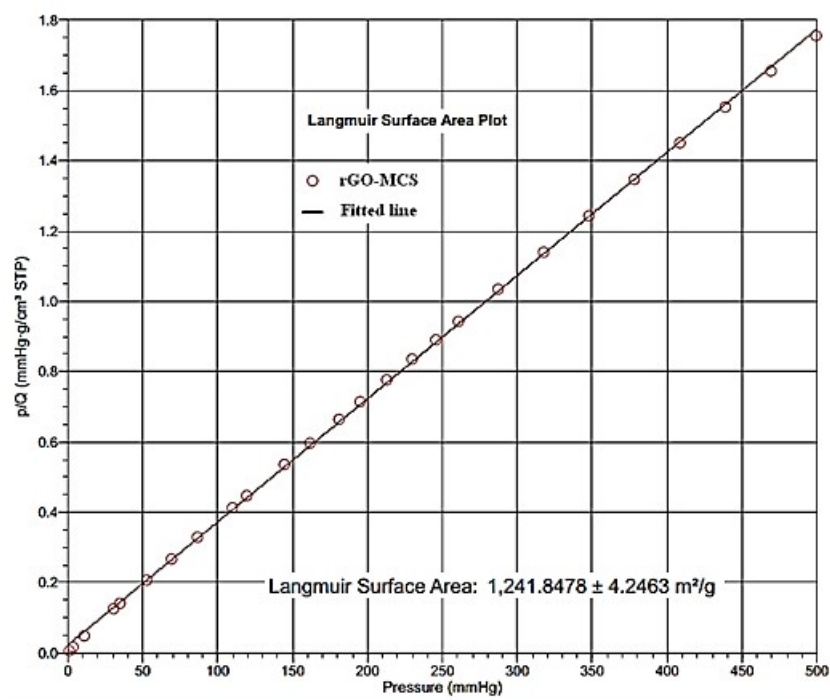

**Fig. S1.** Results of surface area analysis of rGO-MCS powder.

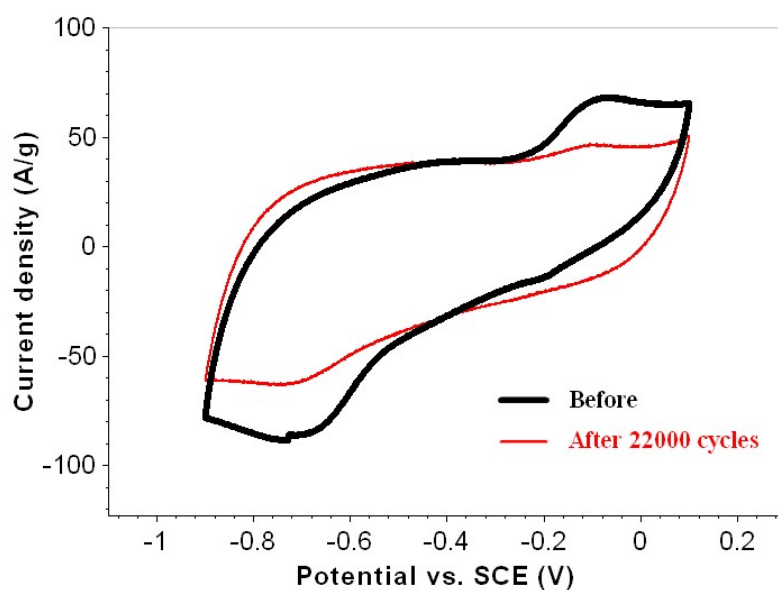

**Fig. S2.** CV curves of the MCS/rGO at scan rate of  $20 \text{ mVs}^{-1}$  before and after 22000 working cycles

*Table S1: Specific capacitance values as a function with the morphology, type of composite and dopant for various potential ranges.*

| Sample                                               | Potential (V) | Electrolyte | Reference electrode               | Specific capacitance ( $\text{F g}^{-1}$ ) | Ref. |
|------------------------------------------------------|---------------|-------------|-----------------------------------|--------------------------------------------|------|
| <i>MnCo<sub>2</sub>S<sub>4</sub></i> nanorods @ NiCo | 0.0 – 0.60    | KOH 6M      | Hg/HgO                            | 2010<br>(at $1 \text{ A g}^{-1}$ )         | [1]  |
| <i>MnCo<sub>2</sub>S<sub>4</sub></i> nanowires       | -0.1 – 0.50   | KOH 3M      | Saturated calomel electrode (SCE) | 2067<br>(at $1 \text{ A g}^{-1}$ )         | [2]  |
| Mn-Co-S-Se nanowires                                 | -0.1 – 0.80   | KOH 2M      | Hg/HgO                            | 2509<br>( $10 \text{ mA cm}^{-2}$ )        | [3]  |
| <i>MnCo<sub>2</sub>S<sub>4</sub></i> nanotubes       | 0.0 – 0.60    | KOH 6M      | SCE                               | 2667<br>( $10 \text{ A g}^{-1}$ )          | [4]  |

|                                                                           |                    |                                                                                                                                           |                                                                                                                       |                                                 |                  |
|---------------------------------------------------------------------------|--------------------|-------------------------------------------------------------------------------------------------------------------------------------------|-----------------------------------------------------------------------------------------------------------------------|-------------------------------------------------|------------------|
| <i>MnCo<sub>2</sub>S<sub>4</sub>/FeCo<sub>2</sub>S<sub>4</sub>@carbon</i> | 0.0 – 0.60         | KOH 3M                                                                                                                                    | Hg/HgO                                                                                                                | 2806<br>(at 1 A g <sup>-1</sup> )               | [5]              |
| <i>MnCo<sub>2</sub>S<sub>4</sub> nanoflakes</i>                           | 0.0 – 0.6          | -                                                                                                                                         | -                                                                                                                     | 3215<br>(at 1 A g <sup>-1</sup> )               | [6]              |
| <i>CoMnS<sub>4</sub> nanoflowers</i>                                      | -0.2 – 0.50        | KOH 2M                                                                                                                                    | -                                                                                                                     | 3469<br>(at 1 A g <sup>-1</sup> )               | [7]              |
| <i>Mn-Co-N-S nanotube</i>                                                 | -0.1– 0.80         | KOH 1M                                                                                                                                    | Hg/HgO                                                                                                                | 3794<br>(at 1 A g <sup>-1</sup> )               | [8]              |
| <i>MnCo<sub>2</sub>S<sub>4</sub> nano-urchins</i>                         | 0.0 – 2.5          | 1.0 M sodium perchlorate (NaClO <sub>4</sub> ) in propylene carbonate/ethylene carbonate (PC/EC) stabilized with fluoroethylene carbonate | Pure sodium flakes were tailored into same size as the active electrodes and used as the counter/reference electrodes | 4036<br>(at 2 mV s <sup>-1</sup> )              | [9]              |
| <i>C-doped MnCo<sub>2</sub>S<sub>4</sub> nanocubes</i>                    | 0.0 – 0.45         | KOH 3M                                                                                                                                    | Ag/AgCl (3 M KCl)                                                                                                     | 4204<br>(at 5 A g <sup>-1</sup> )               | [10]             |
| <b><i>MnCo<sub>2</sub>S<sub>4</sub> nanoparticles/RGO</i></b>             | <b>-0.9 – 0.10</b> | <b>KOH 6M</b>                                                                                                                             | <b>SCE</b>                                                                                                            | <b>3812.5</b><br><b>(at 2 A g<sup>-1</sup>)</b> | <b>This work</b> |

## References

[1] H. Liang, T. Lin, S. Wang, H. Jia, C. Li, J. Cao, J. Feng, W. Fei, J. Qi, A free-standing manganese cobalt sulfide@cobalt nickel layered double hydroxide core-shell heterostructure for an asymmetric supercapacitor, Dalton Transactions. 49 (2019) 196–202. <https://doi.org/10.1039/c9dt03974k>.

- [2] S. Liu, S.C. Jun, Hierarchical manganese cobalt sulfide core-shell nanostructures for high-performance asymmetric supercapacitors, *Journal of Power Sources*. 342 (2017) 629–637. <https://doi.org/10.1016/j.jpowsour.2016.12.057>.
- [3] Z. Fu, H. He, S. Chen, Y. Wang, M. Ma, M. Ye, Mn-Co-S-Se Nanowires for Energy Storage and Conversion, *ACS Applied Nano Materials*. 3 (2020) 7428–7437. <https://doi.org/10.1021/acsnm.0c01006>.
- [4] P. Li, X. Ma, F. Liu, J. Tan, Y. Zhao, L. Wang, K. Zhu, Facile Fabrication of MCo<sub>2</sub>S<sub>4</sub> (M = Mn, Ni) Nanotube Arrays for High-Performance Supercapacitors, *Electronic Materials Letters*. 15 (2019) 462–470. <https://doi.org/10.1007/s13391-019-00148-5>.
- [5] Y. Huang, F. Cui, J. Bao, Y. Zhao, J. Lian, T. Liu, H. Li, MnCo<sub>2</sub>S<sub>4</sub>/FeCo<sub>2</sub>S<sub>4</sub> “lollipop” arrays on a hollow N-doped carbon skeleton as flexible electrodes for hybrid supercapacitors, *Journal of Materials Chemistry A*. 7 (2019) 20778–20789. <https://doi.org/10.1039/c9ta04457d>.
- [6] T.L. Tamang, S.G. Mohamed, G. Dhakal, J. Shim, Morphology controlling of manganese-cobalt-sulfide nanoflake arrays using polyvinylpyrrolidone capping agent to enhance the performance of hybrid, *Journal of Colloid And Interface Science*. (2022). <https://doi.org/10.1016/j.jcis.2022.05.103>.
- [7] X. Hu, S. Liu, Y. Chen, J. Jiang, H. Cong, J. Tang, Y. Sun, S. Han, H. Lin, Rational design of flower-like cobalt-manganese-sulfide nanosheets for high performance supercapacitor electrode materials, *New Journal of Chemistry*. 44 (2020) 11786–11795. <https://doi.org/10.1039/d0nj01727b>.
- [8] M. Li, J. Wang, F. Wang, Y. Zhai, X. Zhang, H. Lv, T. Yu, G. Lv, Construction of internal and external defect electrode materials based on hollow manganese-cobalt-nickel sulfide nanotube arrays, *Applied Surface Science*. 568 (2021) 150900. <https://doi.org/10.1016/j.apsusc.2021.150900>.
- [9] L.K.A. Yew Von Lim, Shaozhan Huang, Qingyun Wu, Dezhi Kong, Ye Wang, Yanfang Zhu, Yanxia Wang, Yun-Xiao Wang, Hua-Kun Liu, Shi-Xue Dou, and H.Y. Yang, Super Kinetically Pseudocapacitive MnCo<sub>2</sub>S<sub>4</sub> Nanourchins toward High-Rate and Highly Stable Sodium-Ion Storage, *Advanced Functional Materials*. 30 (2020) 1909702.
- [10] A. Pramanik, S. Maiti, M. Sreemany, S. Mahanty, Carbon Doped MnCo<sub>2</sub>S<sub>4</sub> Microcubes Grown on Ni foam as High Energy Density Faradaic Electrode, *Electrochimica Acta*. 213 (2016) 672–679. <https://doi.org/10.1016/j.electacta.2016.07.159>.
